# Supplementary material
Source: HighWire-hosted journal article supplement (https://tsaco.bmj.com/content/3/1/e000187)
Supplement: inline-supplementary-material-1 [file inline-supplementary-material-1.docx]

**Supplemental Table 1.** Patient information for those undergoing sternotomy, pericardial window and drainage, or both.

| Pt | Age | Gender | MOI | Systolic BP | Pulse | GCS | US +/- Effusion | Laparotomy | Surgical Approach | AAST OIS | Drain amount | Drain type | Drain Removed POD | Intra-op TEE | Vent days | ICU days | Hosp days | Dispo |
| --- | --- | --- | --- | --- | --- | --- | --- | --- | --- | --- | --- | --- | --- | --- | --- | --- | --- | --- |
| 1 | 51 | M | KSW | 138 | 93 | 15 | FAST+ | No | PCW | - | 60 | 24F | 3 | No | 0 | 4 | 12 | Home |
| 2 | 33 | M | KSW | 174 | 110 | 15 | FAST+ | Yes | TDW | - | 40 | 24F | 5 | Yes | 1 | 3 | 5 | Home |
| 3 | 25 | F | KSW | 149 | 120 | 15 | FAST+ | No | PCW | - | 300 | 24F | 4 | Yes | 2 | 4 | 5 | Home |
| 4 | 21 | M | KSW | 118 | 80 | 15 | - | No | PCW | - | 200 | 32F | 2 | No | 0 | 1 | 3 | Home |
| 5 | 29 | M | KSW | 140 | 94 | 15 | FAST-/FAST+* | Yes | PCW | - | 600 | 24F | 4 | Yes | 4§ | 10 | 15† | Home |
| 6 | 52 | M | GSW | 218 | 100 | 15 | - | Yes | TDW 🡪 S | 2 | - € | 32F | 9 | Yes | 27 | 28 | 28 | SNF |
| 7 | 42 | M | KSW | 145 | 111 | 15 | FAST+ | Yes | TDW 🡪 S | 1 | 100 | 32F | 2 | Yes | 0 | 3 | 4 | Home |
| 8 | 29 | M | KSW | 101 | 106 | 15 | - | Yes | PCW 🡪 S | 1 | 500 | 32F | 2 | No | 0 | 3 | 11 | Home |
| 9 | 24 | M | KSW | 71 | 52 | 15 | TEE+ | No | Sternotomy | 1 | 500 | 32F | 2 | No | 0 | 2 | 3 | Home |
| 10 | 48 | M | KSW | 65 | 88 | 3 | TTE+ | No | Sternotomy | 1 | 150 | 36F | 5 | No | 0 | 1 | 20 | Home |
| 11 | 17 | M | KSW | 143 | 105 | 15 | TTE+ | No | Sternotomy | 3 | 175 | 32F | 2 | Yes | 0 | 2 | 6 | Home |
| 12 | 35 | M | KSW | 143 | 121 | 15 | FAST+ | No | Sternotomy | 2 | - £ | 32F | 4 | No | 1 | 2 | 7 | Home |

M=male, F=Female, MOI = Mechanism of Injury, KSW = Knife Stab Wound, GSW = Gunshot Wound, BP = Blood Pressure, GCS = Glasgow Coma Score, US = Ultrasonography, FAST = Focused Assessment with Sonography for Trauma, TEE = Trans-esophageal echocardiogram, TTE = Trans-thoracic echocardiogram, PCW=Subxiphoid Pericardial Window, TDW=Transdiaphragmatic Pericardial Window, F = French, S = Sternotomy.
*FAST negative at presentation, follow-up cardiac ultrasound showed significant pericardial effusion on hospital day 7.
†Hospital stay 8 days after PCW and drainage.
§Ventilator days all prior to pericardial window.
£ Quantity stated as “significant”
€ Quantity stated as “moderate”
