# Supplementary material
Source: HighWire-hosted journal article supplement (https://tsaco.bmj.com/content/3/1/e000187)
Supplement: inline-supplementary-material-2 [file inline-supplementary-material-2.docx]

**Supplemental Table 2.** Post-operative echocardiograms performed for patients in the PCW+drain and Sternotomy groups. Patients not listed did not have post-operative echo performed.

|  | Group | Echo Type | POD | Findings |
| --- | --- | --- | --- | --- |
| 1 | PCW+drain | TTE | 2 | No effusion, borderline LVH |
| 2 | PCW+drain | TTE | 0 | No effusion |
|  |  | TTE | 1 | No effusion |
| 3 | PCW+drain | TTE | 4 | No effusion, mildly dilated RA |
| 5 | PCW+drain | TTE | 4 | Trivial effusion, mild LVH, |
|  |  | TTE | 6 | Trivial effusion |
| 6 | Sternotomy | TTE | 1 | No effusion, mild LVH |
|  |  | TTE | 4 | No effusion, RV/RA/LA mild dilation |
|  |  | TTE | 16 | Moderate effusion, trace MR, LA/RA mild dilation |
|  |  | TTE | 18 | Large effusion |
|  |  | TTE | 27 | Moderate effusion, severe LVH, chambers normal |
| 10 | Sternotomy | TTE | 8 | No effusion, mildly thickened pericardium, mildly dilated LV |
| 12 | Sternotomy | TTE | 7 | No effusion, borderline RV enlargement |

POD = Post-Operative Day, TEE = Trans-esophageal echocardiogram, TTE = Trans-thoracic echocardiogram, LVH = Left Ventricular Hypertrophy, RA = Right Atrium, RV = Right Ventricle, LV = Left Ventricle
